# Supplementary material
Source: MDPI journal article supplement (https://www.mdpi.com/1999-4907/13/1/122)
Supplement: s1 [file s1]

Supplementary files:

**Table S1.** Primers for *PsnWOX* gene cloning.

| Gene Names       | Upstream Primers (5'–3')   | Downstream Primers (5'–3') |
|------------------|----------------------------|----------------------------|
| <i>PsnACT</i>    | CATGCTCCTTTCTGTTCTGC       | GGCTGGTCATTAGATCCTCAGTGG   |
| <i>PsnWOX1a</i>  | CACTCCCTATCATTGAGTCCTTCG   | TTCTTTACAACCCCTTCATCTGC    |
| <i>PsnWOX4a</i>  | CCTTTCATTGAGTCCTTCACCATGG  | TCAAACCCCTTCATCTTCCTTCC    |
| <i>PsnWOX4b</i>  | GCATCTGAAGCTAACACAGATAATGG | CGCAGATCTAAATGTGGATGATCC   |
| <i>PsnWOX5b</i>  | ATGGCTTCATCAAACAAACACTGG   | AAATAGTAGAAAGCACCATGCTGC   |
| <i>PsnWOX9</i>   | TGCCAAAGTATAGCAGGCAGG      | AACAACCTCACACTTGGAAAGC     |
| <i>PsnWOX13a</i> | TAGAGAGAGATTCATGGAGGATGG   | GCAATTCTGGAGGAGACATCATCC   |
| <i>PsnWOX13b</i> | GGAAGTGGAGACTCATGGAGG      | ATGCATGCCACAACGATAGTCC     |
| <i>PsnWOX13c</i> | CATGCTCCTTTCTGTTCTGC       | GGCTGGTCATTAGATCCTCAGTGG   |

**Table S2.** SQ-PCR primers for the *PsnWOX* gene.

| Gene Names       | Upstream Primers (5'–3')  | Downstream Primers (5'–3') |
|------------------|---------------------------|----------------------------|
| <i>PsnACT</i>    | CCAGCAACCGCAATACAA        | CTTCACCATTCCAGTTCCATT      |
| <i>PsnWOX1a</i>  | GGTTATGAAGGTGAACAGACCAGG  | TGTGTTGACGCACTTGTAGTAGC    |
| <i>PsnWOX4a</i>  | CTATGGACAGGAAACAGCTATGACC | CGTCAGAAGAGGCAAGATTCTAGG   |
| <i>PsnWOX4b</i>  | GAGGAACAGCCTTGTTTAAAGC    | CTATGGACAGGAAACAGCTATGACC  |
| <i>PsnWOX5b</i>  | TGTGGCACAGGAATAAATGTGG    | TGCAGCTGCAGCTTCATTGC       |
| <i>PsnWOX9</i>   | ATGGCTTCATCAAACAAACACTGG  | AAATAGTAGAAAGCACCATGCTGC   |
| <i>PsnWOX13a</i> | CCAAAGTATAGCAGGCAGGATGG   | CCTCCTGCAAGATCTTGCTGG      |
| <i>PsnWOX13b</i> | CTTGAGAGAGATTCATGGAGGATGG | CTGCCTCGACCCTATCTTGCTGG    |
| <i>PsnWOX13c</i> | GCCAACTGACGAAAACACC       | ATGCCACAACGATAGTCCTAAGC    |

**Table S3.** Motif sequences of *PsnWOX* proteins.

| Motif Names | Motif Sequences                                    |
|-------------|----------------------------------------------------|
| Motif 1     | ILEJFRSGTRTPSRDZIQDITAZLSEYGQIEGKNVIFYWFQNHKARERQK |
| Motif 2     | VKVMTDEQMETLRKQIAVYATICEQLVEMHKSLSAQQDLAAG         |
| Motif 3     | IPATRWNPTEQJR                                      |
| Motif 4     | VFINEVPLEVTSGPFBVKAAFGDDVLIHSSGQPILTDEFGVLLHSLQHG  |
| Motif 5     | GDDQLVGKMGSPGSYNPYWQLEDYGLFG                       |
| Motif 6     | MKVHQLARGFWEHEPFLTGFKRLRPLAPKLANTDHSAASFDLKSFIKRPD |
| Motif 7     | RTLELFPLHPEG                                       |
| Motif 8     | VEREEDSPYKRKCRSWTFECLELEDSRSC                      |
| Motif 9     | MASSNKHWPSPMFKSKP                                  |
| Motif 10    | NNGESEVETEIESFKEKK                                 |

**Table S4.** Information on the Segmental duplications analysis of the *PsnWOX* genes.

| Gene Pairs | Gene1              | Gene2              | Ka          | Ks          | Ka/Ks       | Type      |
|------------|--------------------|--------------------|-------------|-------------|-------------|-----------|
| Pair1      | Potri.002G008800.1 | Potri.005G101800.1 | 0.234170767 | 1.271288749 | 0.184199512 | Segmental |
| Pair2      | Potri.002G008800.1 | Potri.005G252800.1 | 0.063021051 | 0.270234573 | 0.233208691 | Segmental |
| Pair3      | Potri.002G124100.1 | Potri.014G025300.1 | 0.028706733 | 0.19177761  | 0.149687616 | Segmental |
| Pair4      | Potri.004G051600.1 | Potri.011G061400.1 | 0.087552149 | 0.307354202 | 0.284857498 | Segmental |
| Pair5      | Potri.007G012100.1 | Potri.005G114700.1 | 0.078499102 | 0.187043513 | 0.419683639 | Segmental |
| Pair6      | Potri.008G065400.1 | Potri.010G192100.1 | 0.061701078 | 0.21368582  | 0.288746713 | Segmental |
| Pair7      | Potri.012G047700.1 | Potri.015G039100.1 | 0.091839004 | 0.226710654 | 0.405093463 | Segmental |

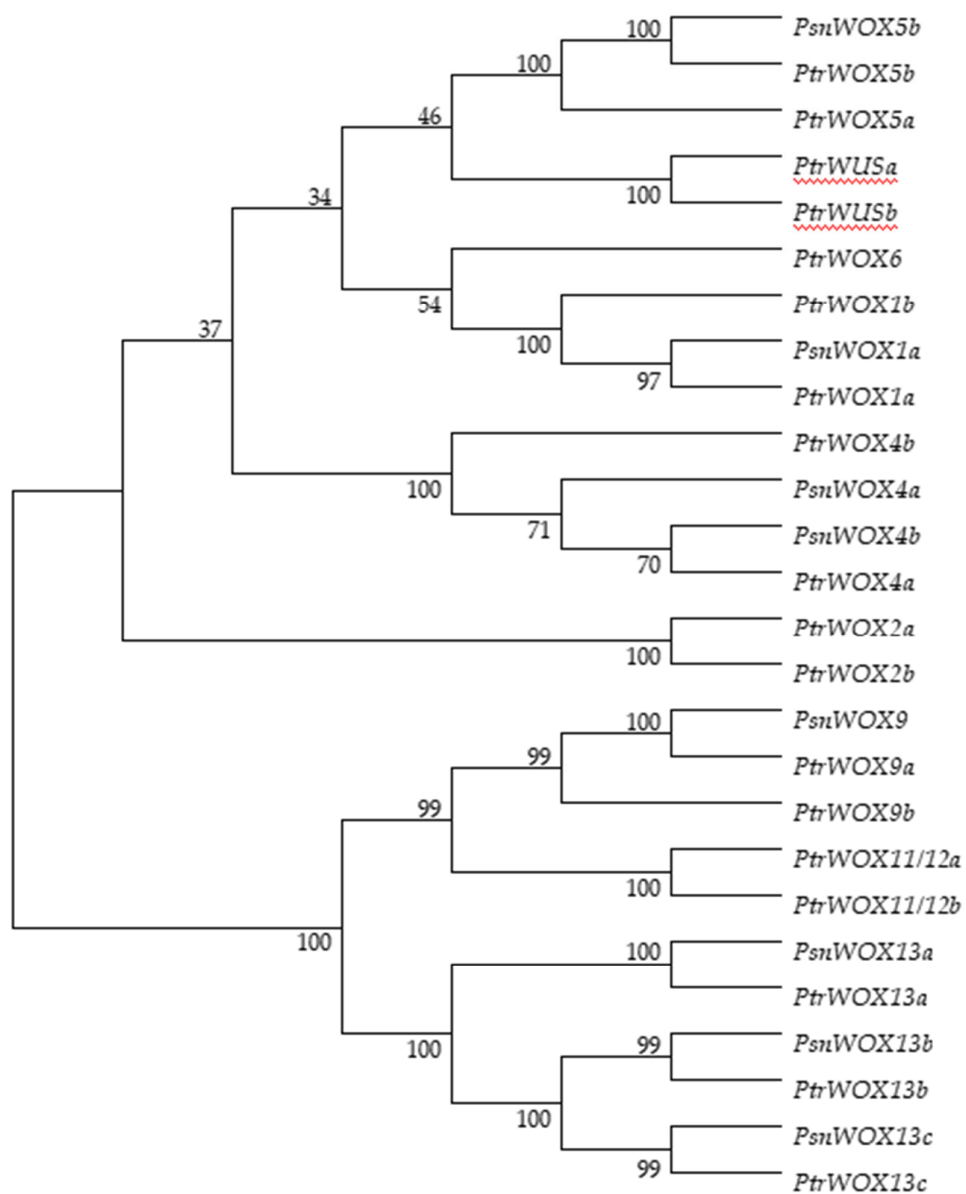

**Figure S1.** Phylogenetic tree of *Populus* × *xiaohei* and *P. trichocarpa*.

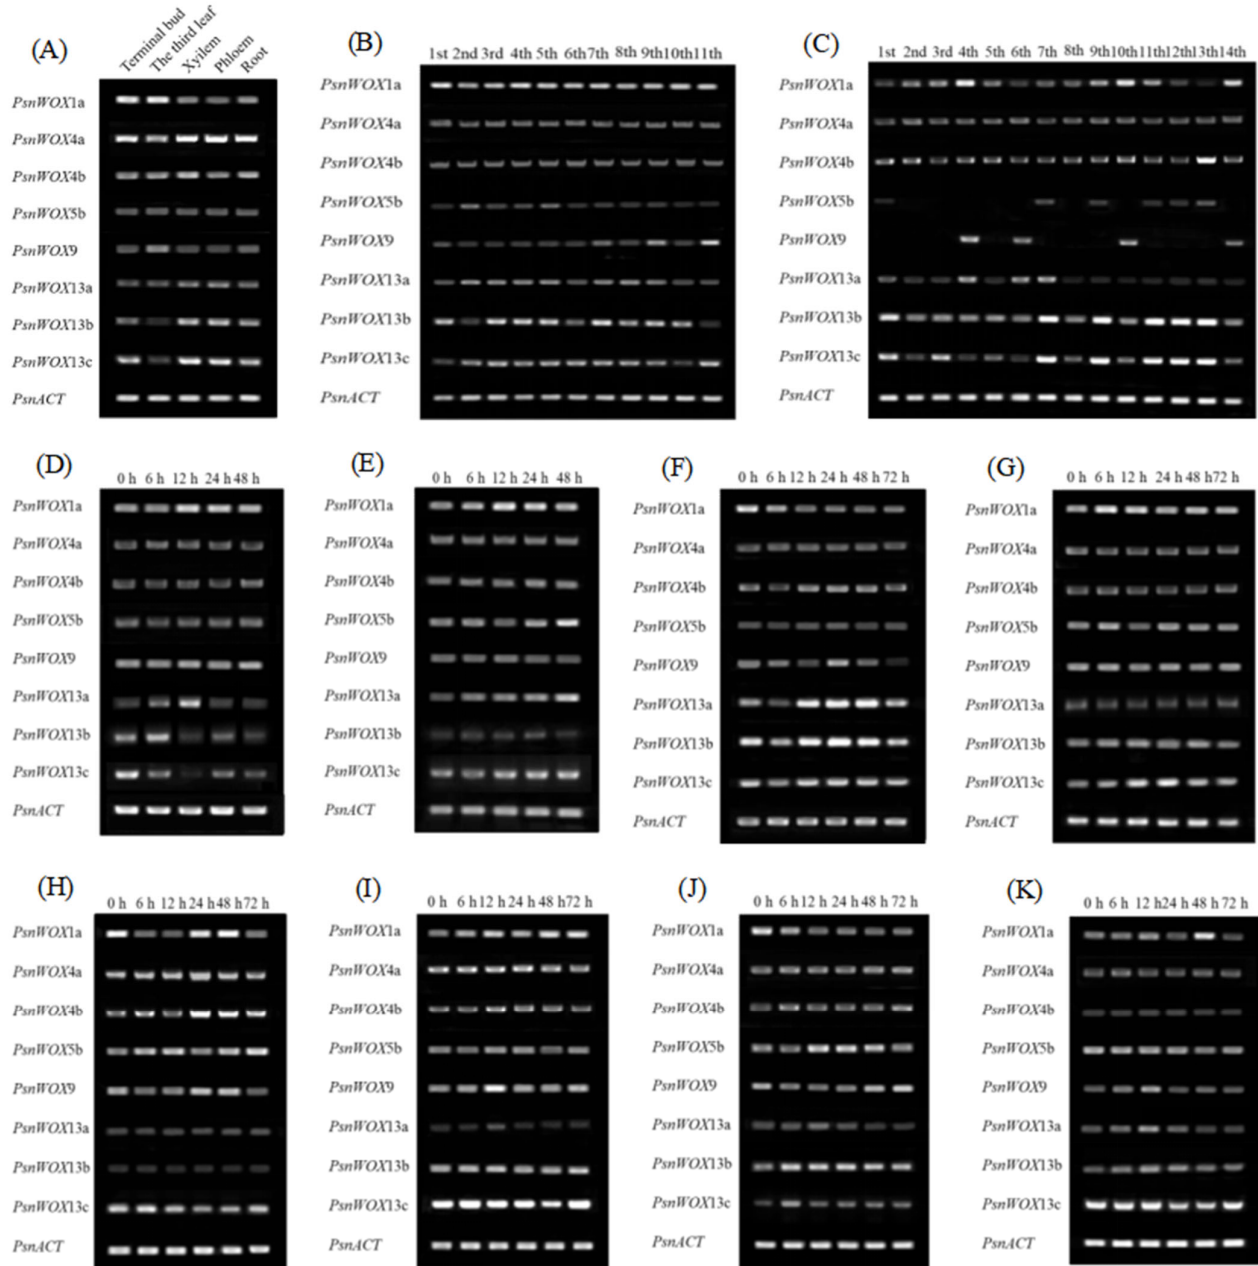

**Figure S2.** SQ-PCR electrophoresis profiles of the WOX gene of *Populus x xiaohei* in tissue sites and under abiotic stress. The relative expression levels of WOX genes in two different tissues (roots and leaves) of *Populus x xiaohei* seedlings treated with CdCl<sub>2</sub>, NaCl, NaHCO<sub>3</sub>, or PEG were analyzed by SQ-PCR. (A) Different tissue sites; (B) Stem nodes throughout the development period; (C) Leaves throughout development; (D) Expression of CdCl<sub>2</sub> treatment in roots; (E) Expression of CdCl<sub>2</sub> treatment in leaves; (F) Expression of NaCl treatment in roots; (G) Expression of NaCl treatment in leaves; (H) Expression of NaHCO<sub>3</sub> treatment in roots; (I) Expression of NaHCO<sub>3</sub> treatment in leaves; (J) Expression of PEG treatment in roots; (K) Expression of PEG treatment in leaves.

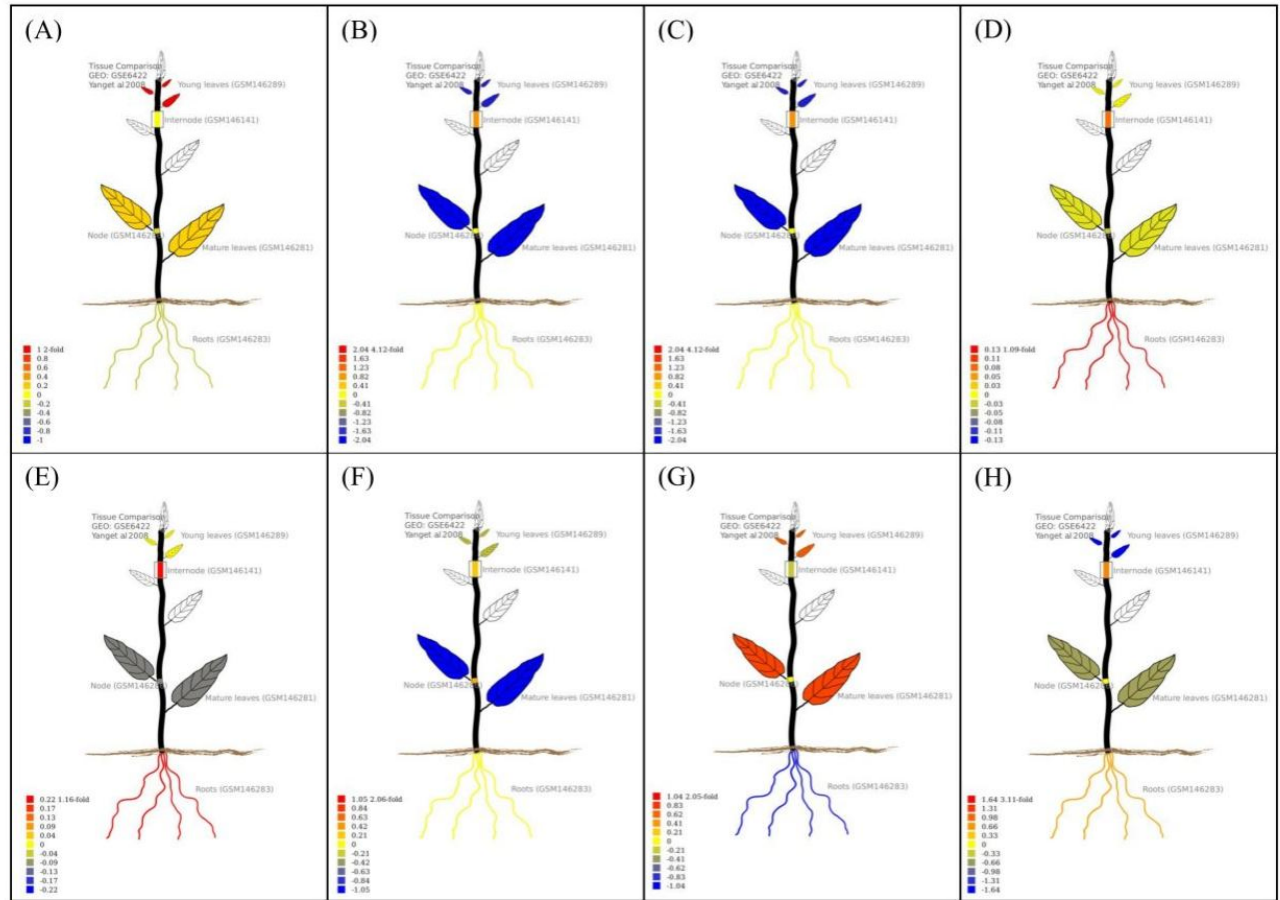

**Figure S3.** Tissue-specific expression profiles of *PtrWOX* genes. Visual images of *PtrWOX* genes in *P. trichocarpa* were generated using tissue-specific expression data of mature leaves, young leaves, roots, nodes, and internodes derived from <https://PlantGenIE.org> (2021.11.25). (A) *PtrWOX1a*; (B) *PtrWOX4a*; (C) *PtrWOX4b*; (D) *PtrWOX5b*; (E) *PtrWOX9*; (F) *PtrWOX13a*; (G) *PtrWOX13b*; (H) *PtrWOX13c*.
